# Supplementary material for: Efficiently modelling urban heat storage: an interface conduction scheme in an urban land surface model (aTEB v2.0)
Source: Copernicus journal article supplement (doi:10.5194/gmd-10-991-2017), 2017-03-01
Supplement: Supplementary file 3 [file gmd-10-991-2017-supplement.zip]

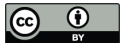

## Supplement of

# Efficiently modelling urban heat storage: an interface conduction scheme in an urban land surface model (aTEB v2.0)

Mathew J. Lipson et al.

Correspondence to: Mathew J. Lipson (m.lipson@unsw.edu.au)

- gmd-10-991-2017-supplement-title-page.pdf
- ics
  - .DS\_Store
  - README.txt
  - ateb
    - \* .DS\_Store
    - \* ateb.f90
    - \* atebwrap.f90
    - \* cable\_air.F90
    - \* cable\_albedo.F90
    - \* cable\_canopy.F90
    - \* cable\_carbon.F90
    - \* cable\_common.F90
    - \* cable\_data.F90
    - \* cable\_define\_types.F90
    - \* cable\_radiation.F90
    - \* cable\_roughness.F90
    - \* cable\_soilsnow.F90
    - \* energy
    - \* makefile
    - \* nml
    - \* out
    - \* pres\_SITEds.nml
    - \* pres\_UZEds.nml
    - \* pres\_WRFds.nml
    - \* pres\_aTEBds.nml
- \* run\_paper.sh
- \* variables
- \* zenith.f90
- conduction
  - \* ICS01\_idealised.py
  - \* ICS01\_observational.py
  - \* fortran
  - \* functions.py
  - \* materials\_interface.py
  - \* taylordiagram.py
- figures
  - \* .DS\_Store
  - \* Fig1.eps
  - \* Fig2\_norm\_MAE\_30min.pdf
  - \* Fig3\_MAE\_30min.pdf
  - \* Fig4\_walls.pdf
  - \* Fig5\_roofs.pdf
  - \* Fig6\_Diurnal.pdf
  - \* Fig7\_Taylor.pdf
  - \* FigD1.pdf
  - \* pickle

The copyright of individual parts of the supplement might differ from the CC-BY 3.0 licence.
