# Supplementary material for: Efficiently modelling urban heat storage: an interface conduction scheme in an urban land surface model (aTEB v2.0)
Source: Copernicus journal article supplement (doi:10.5194/gmd-10-991-2017), 2017-03-01
Supplement: Supplementary file 6 [file gmd-10-991-2017-supplement.zip]

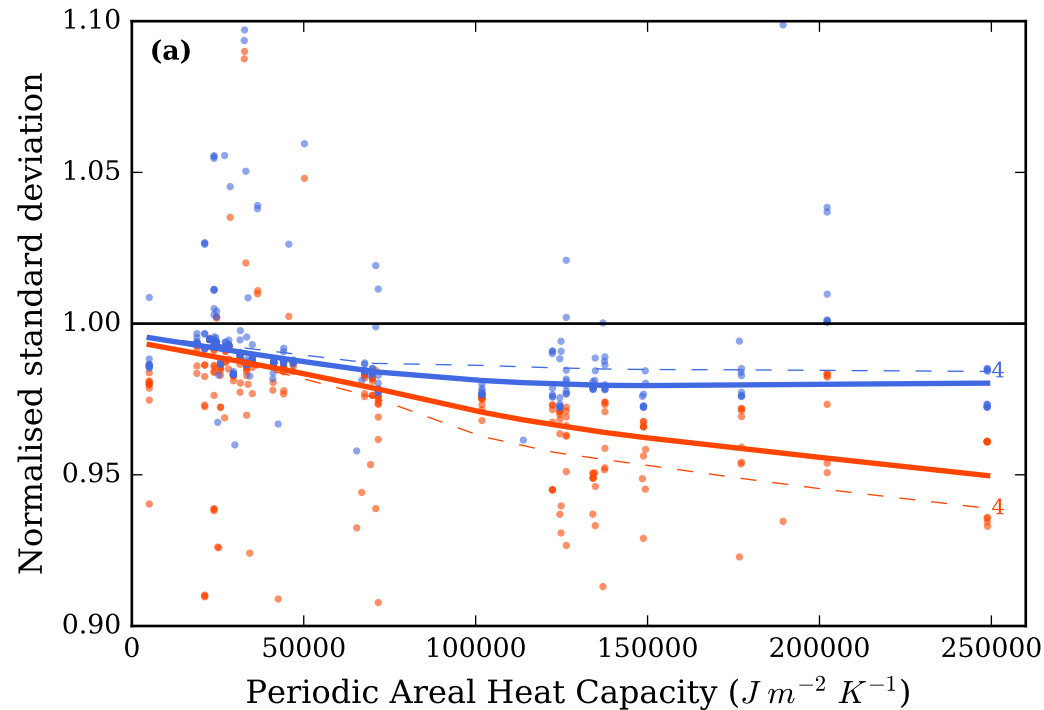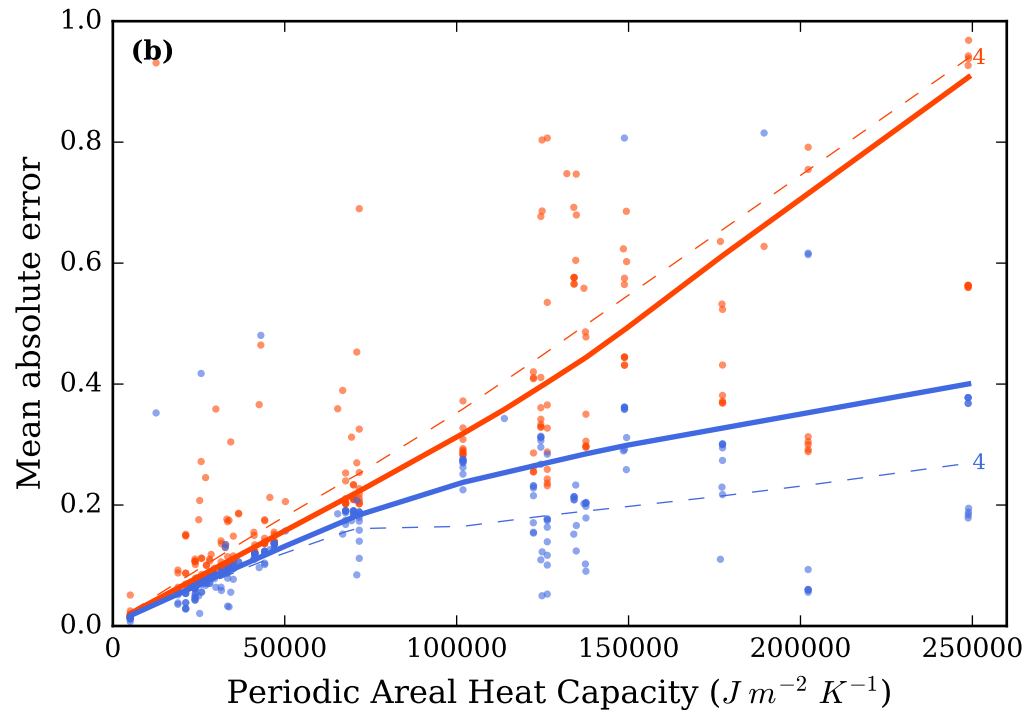

- |                                    |                                          |                                                  |
|------------------------------------|------------------------------------------|--------------------------------------------------|
| • Half-layer: individual wall/roof | — Half-layer: LOWESS for all walls/roofs | - - Half-layer: LOWESS for 4-layered walls/roofs |
| • Interface: individual wall/roof  | — Interface: LOWESS for all walls/roofs  | - - Interface: LOWESS for 4-layered walls/roofs  |
