# Supplementary figures and images for: Efficiently modelling urban heat storage: an interface conduction scheme in an urban land surface model (aTEB v2.0)
Source: Copernicus journal article supplement (doi:10.5194/gmd-10-991-2017), 2017-03-01

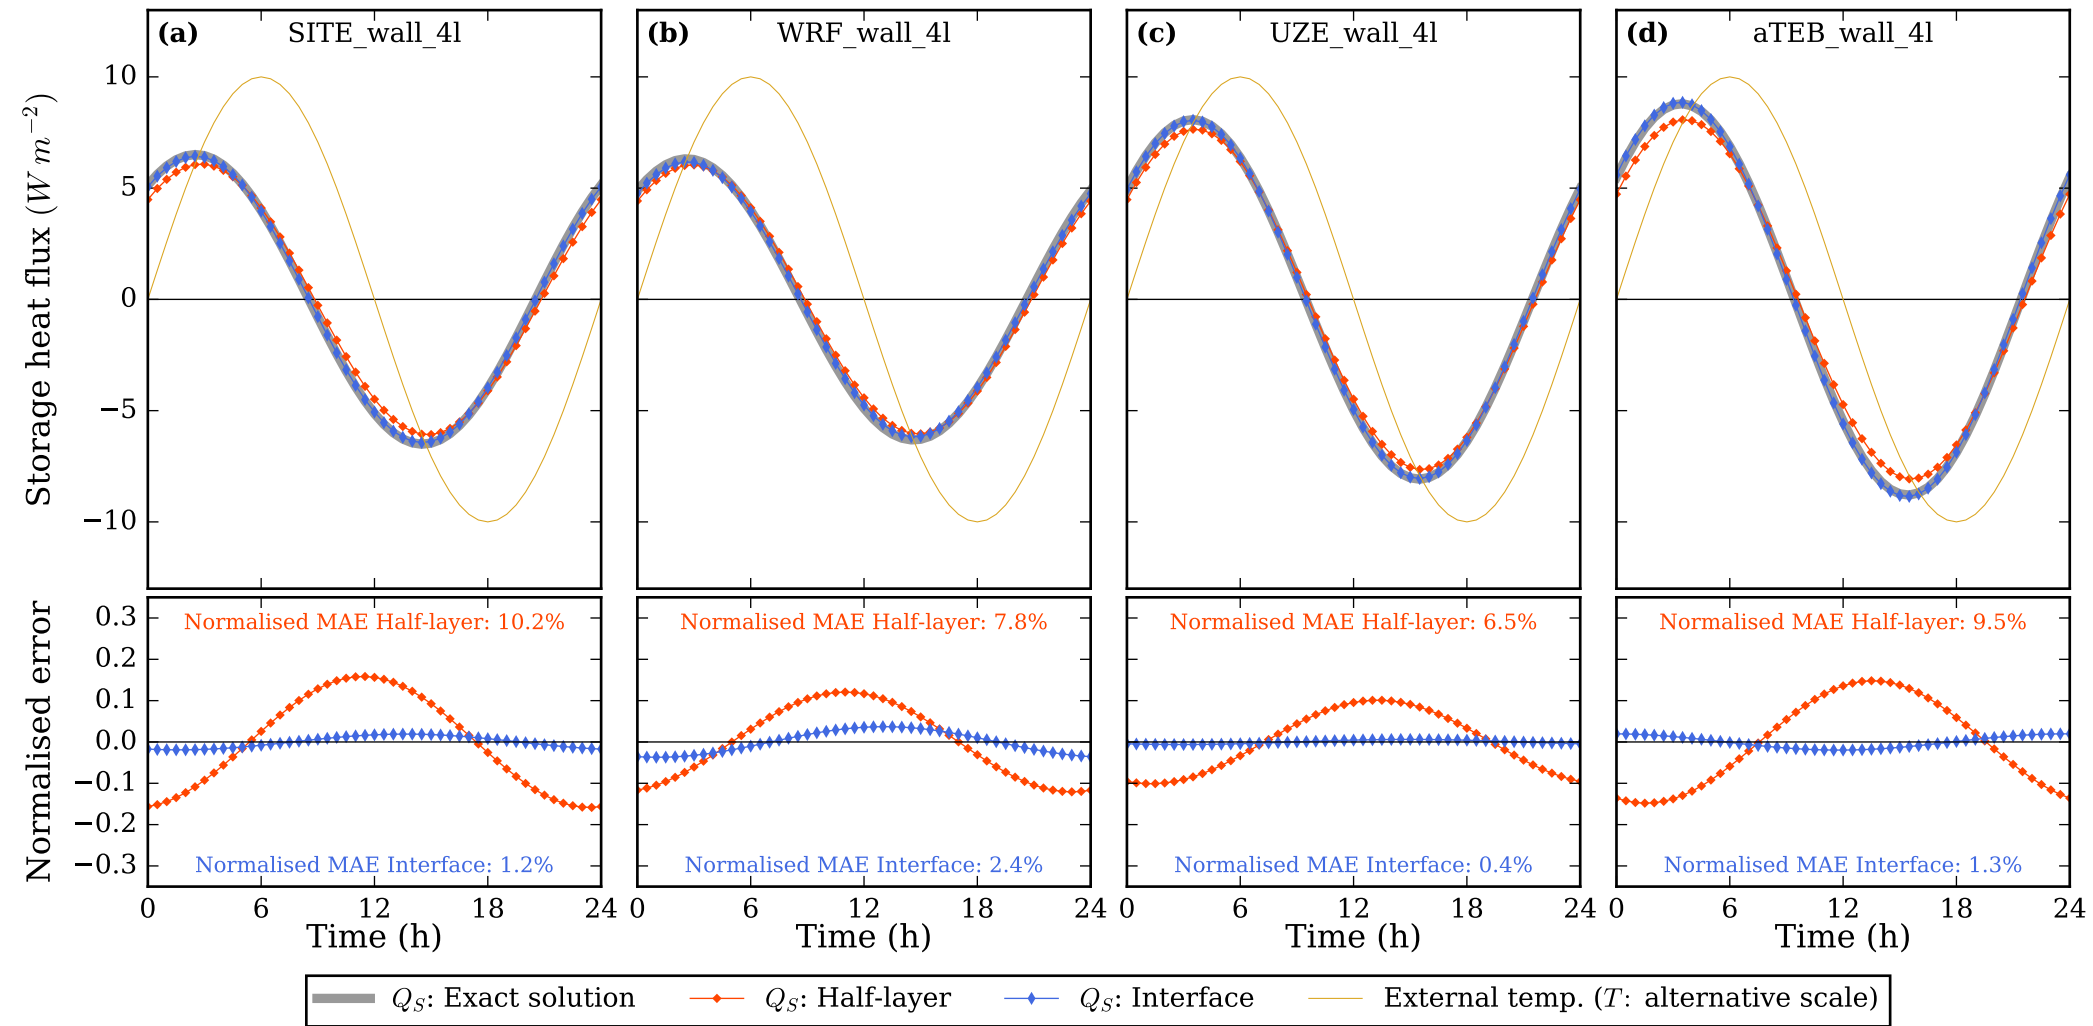

Supplement: Supplementary file 1 [file gmd-10-991-2017-supplement.zip]

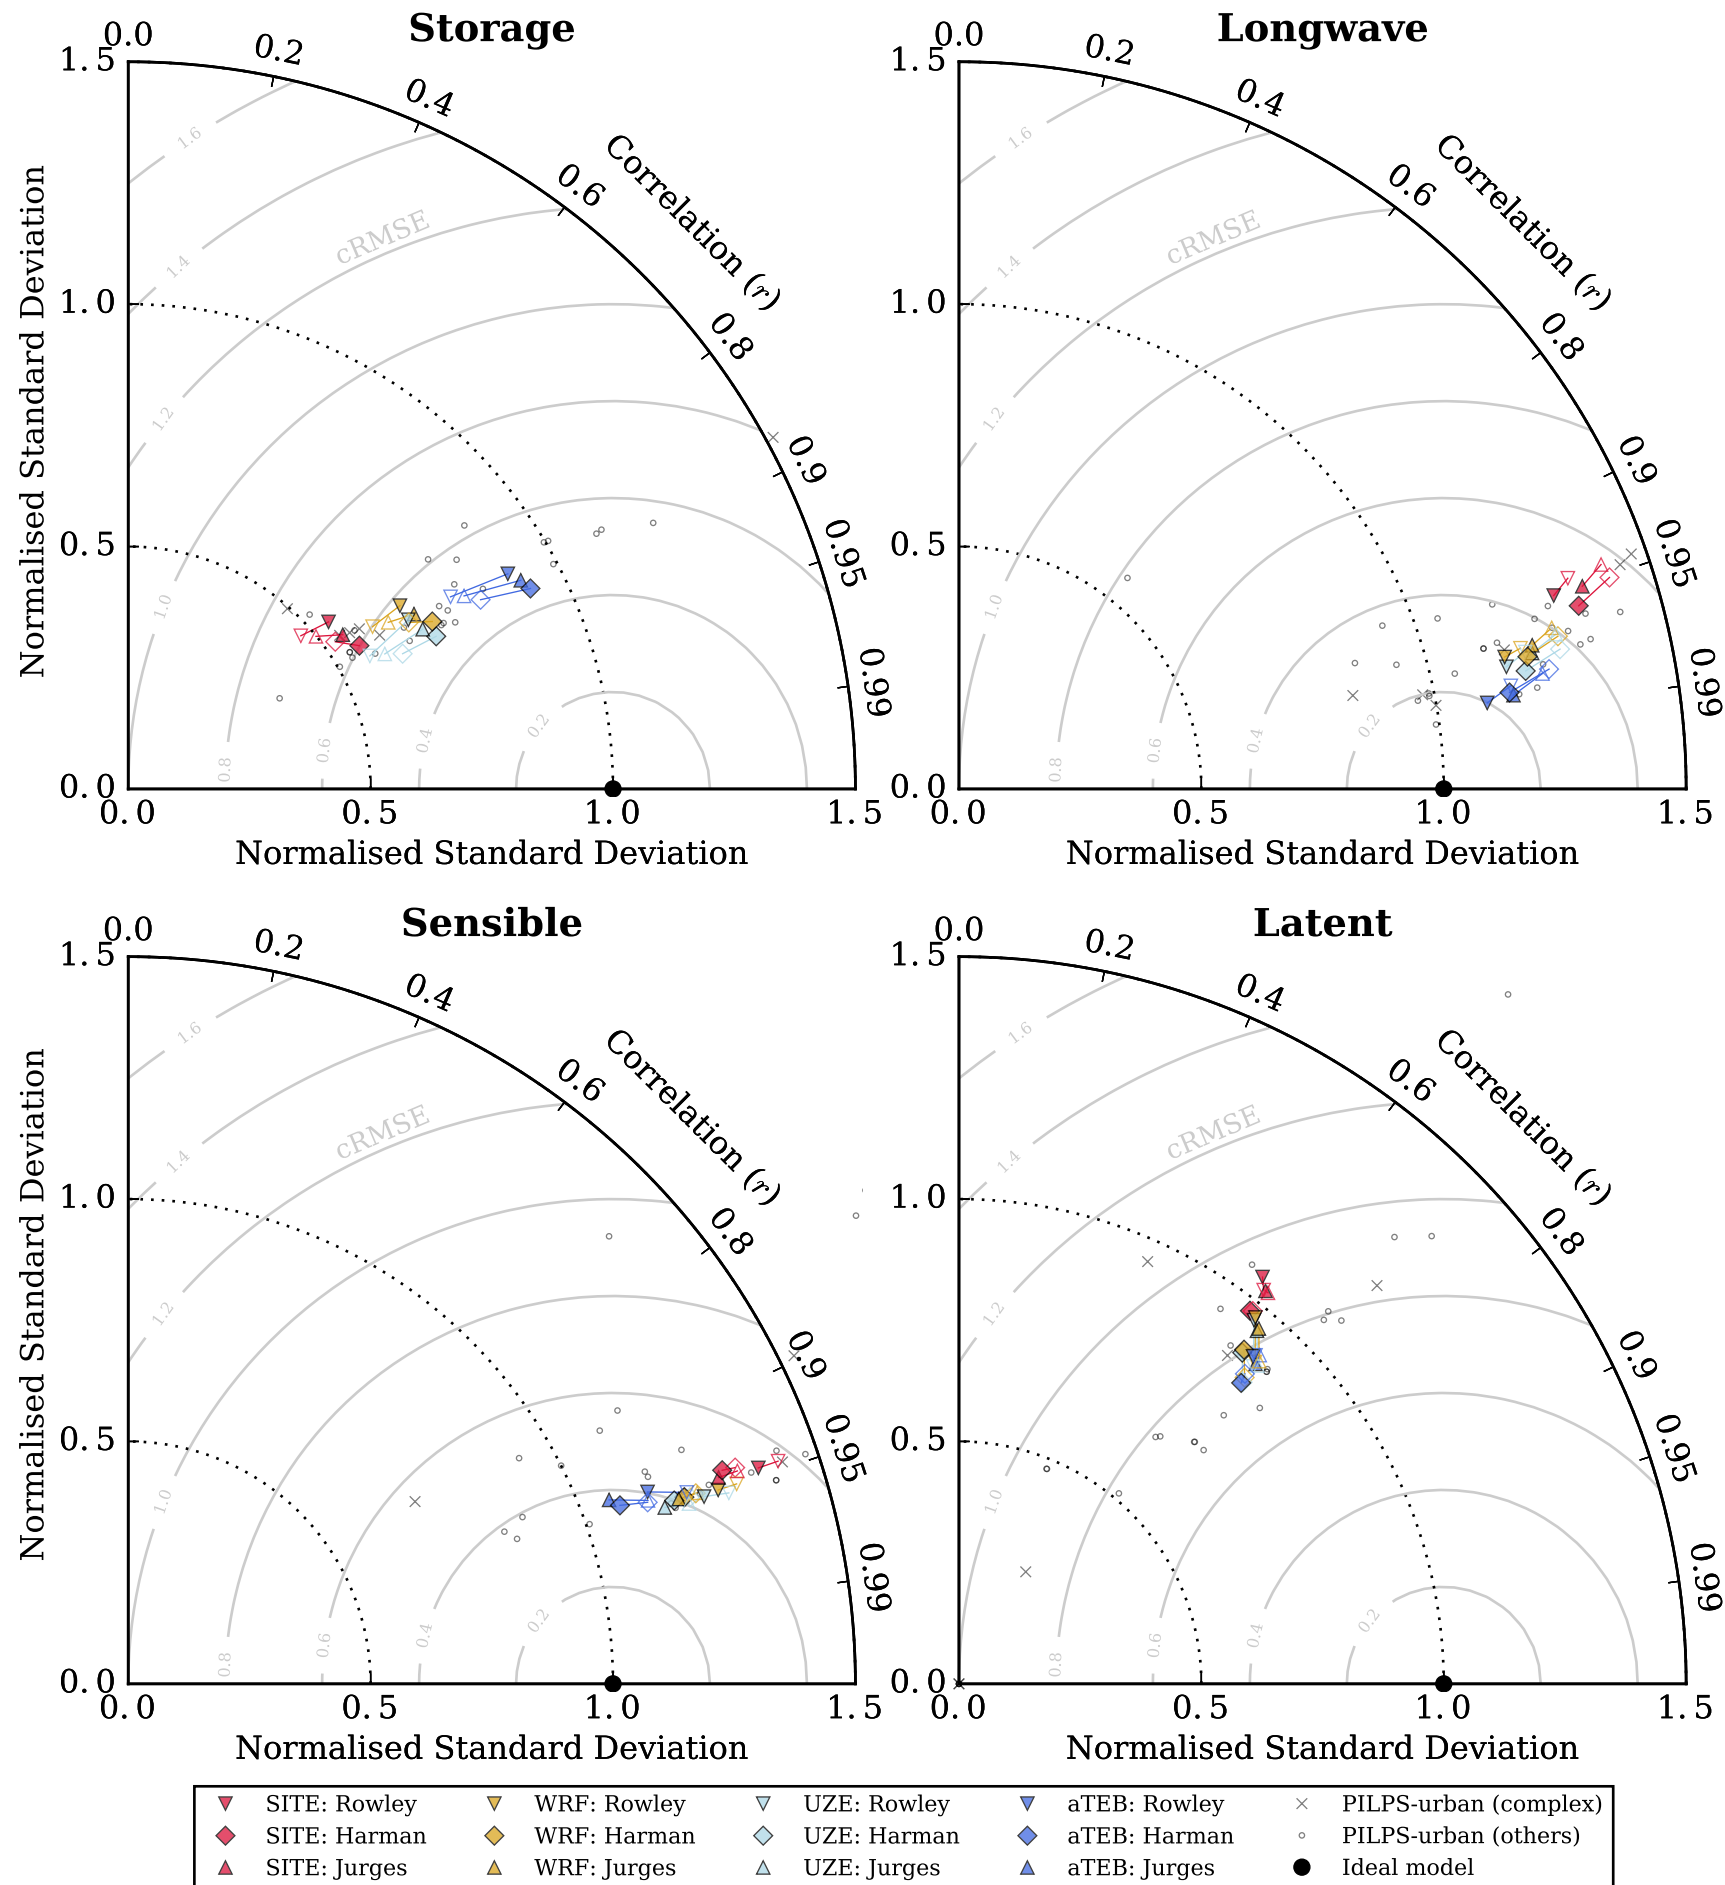

Supplement: Supplementary file 2 [file gmd-10-991-2017-supplement.zip]

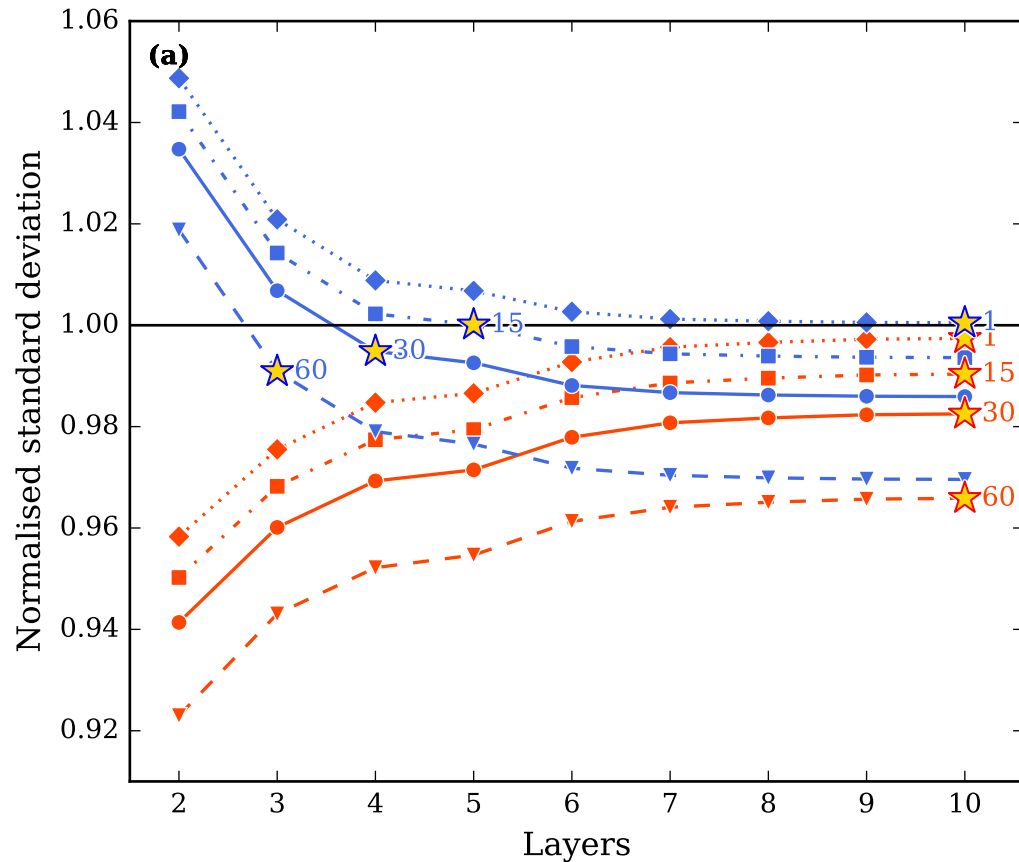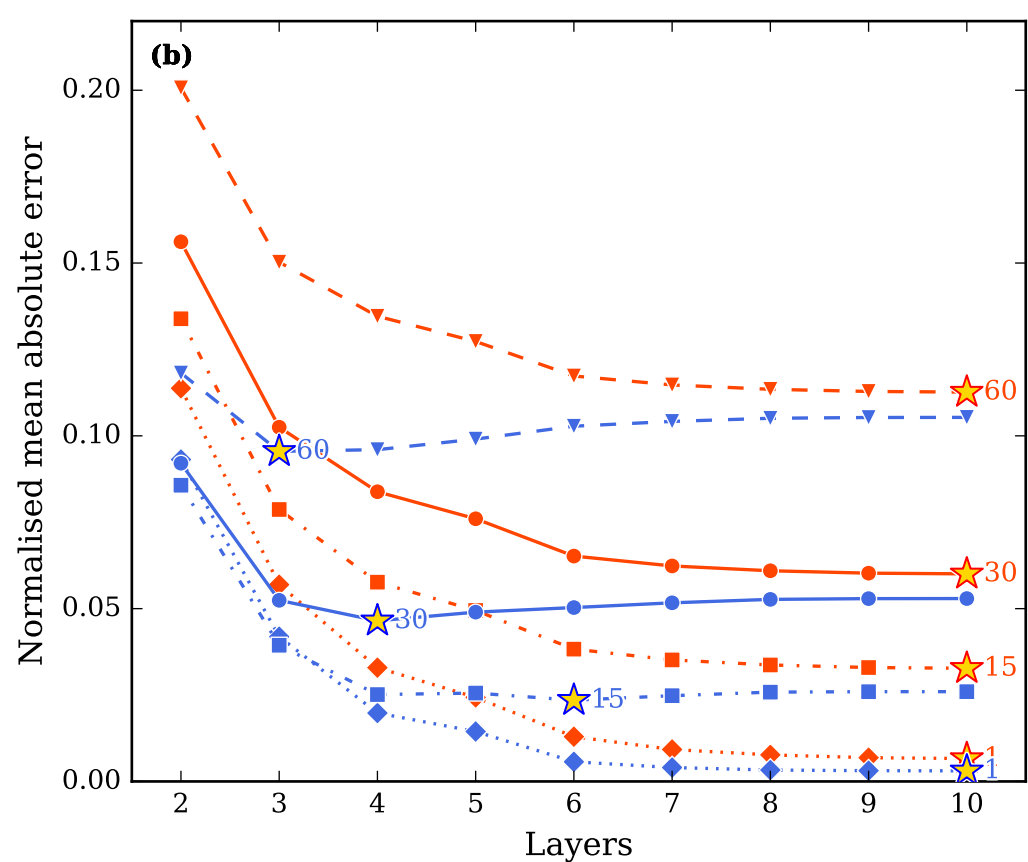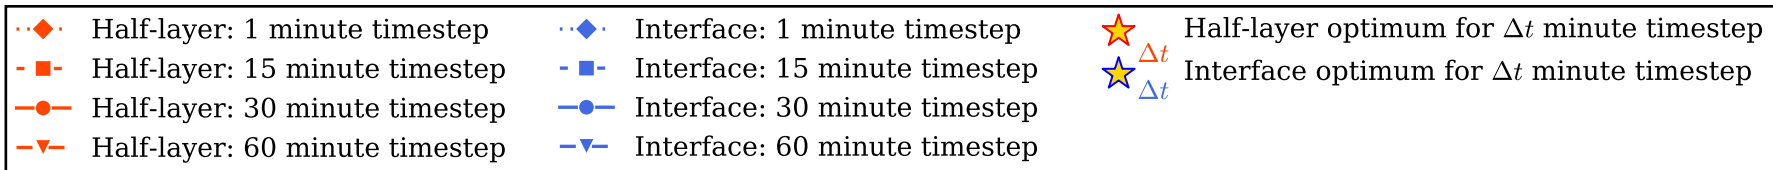

Supplement: Supplementary file 4 [file gmd-10-991-2017-supplement.zip]

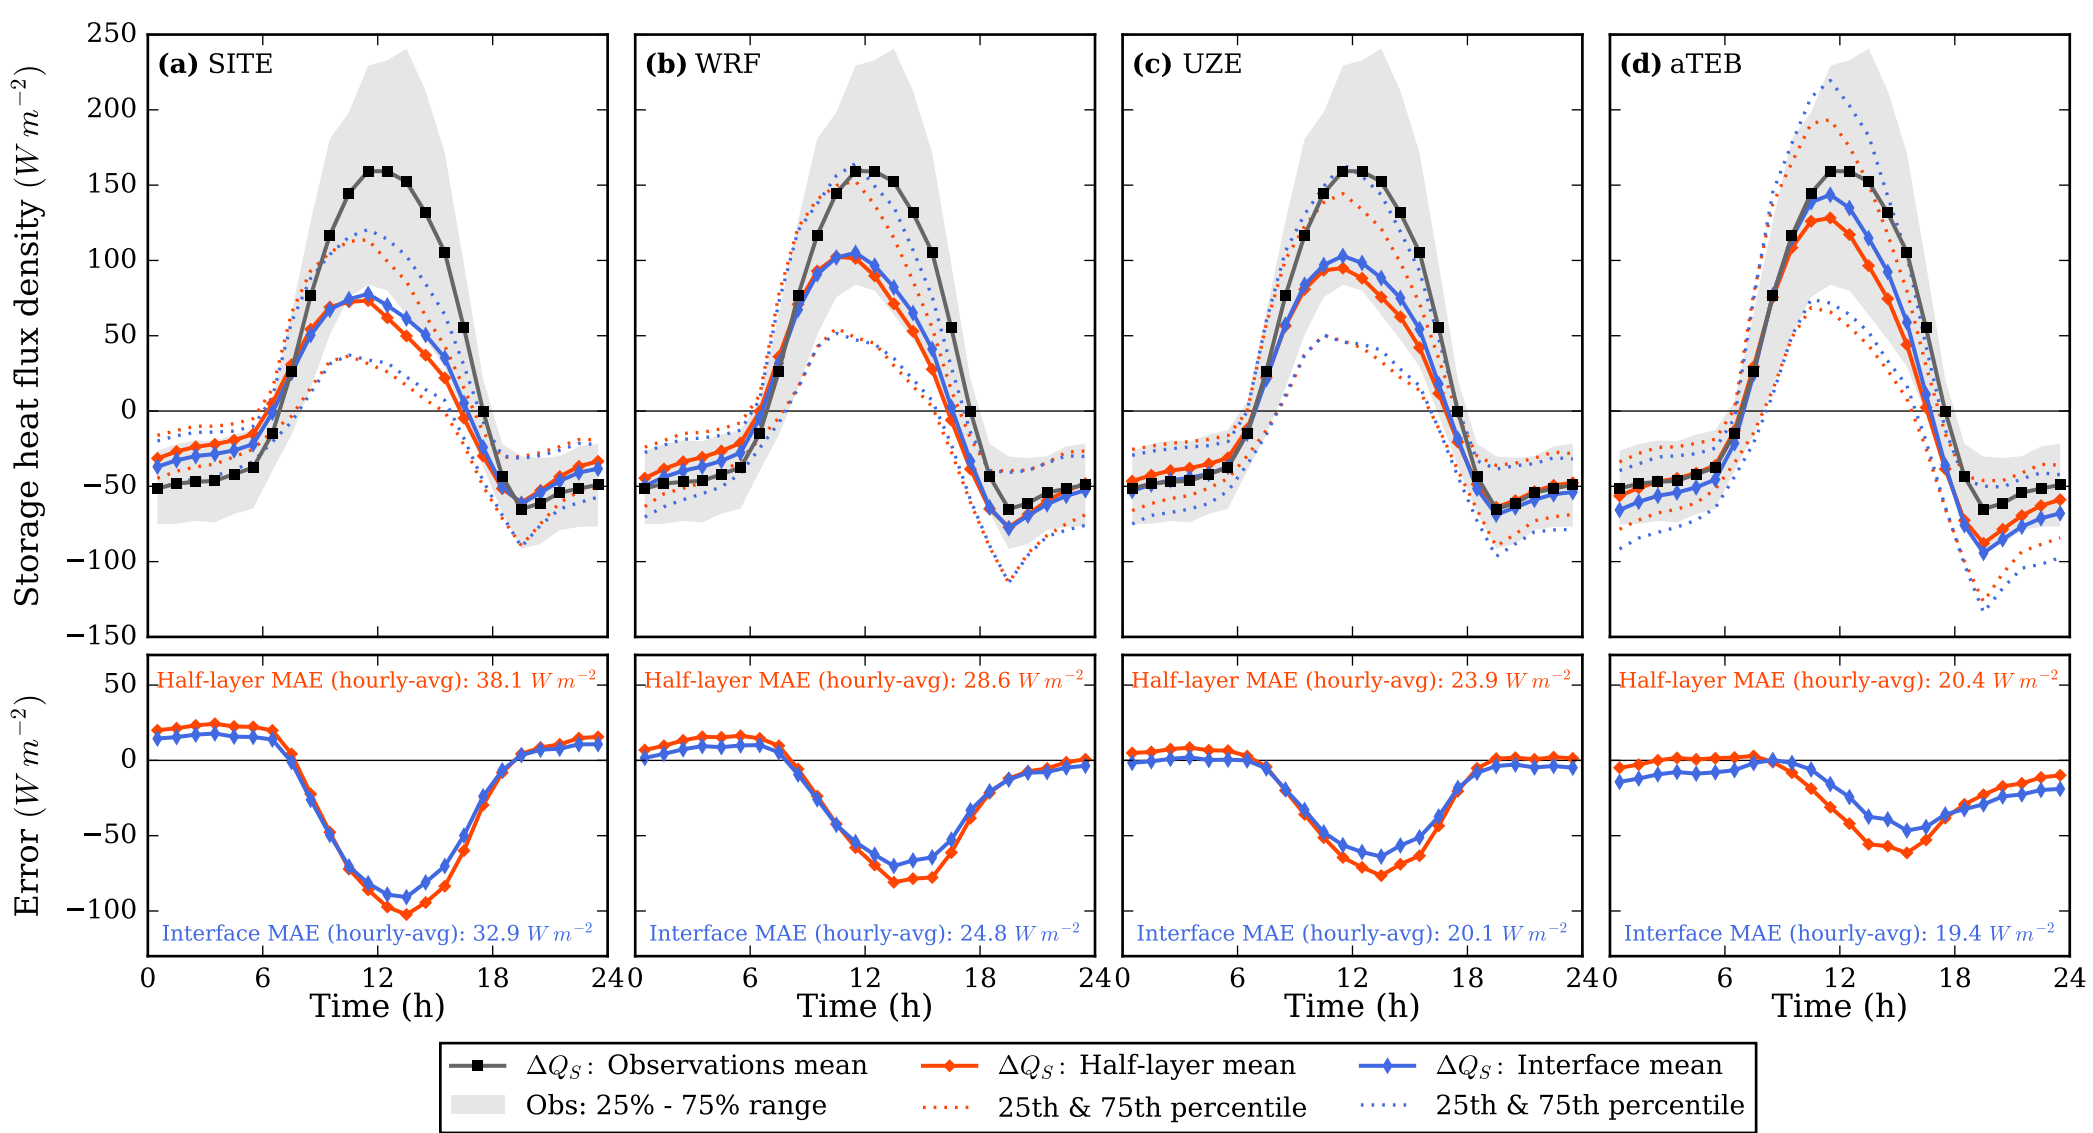

Supplement: Supplementary file 5 [file gmd-10-991-2017-supplement.zip]

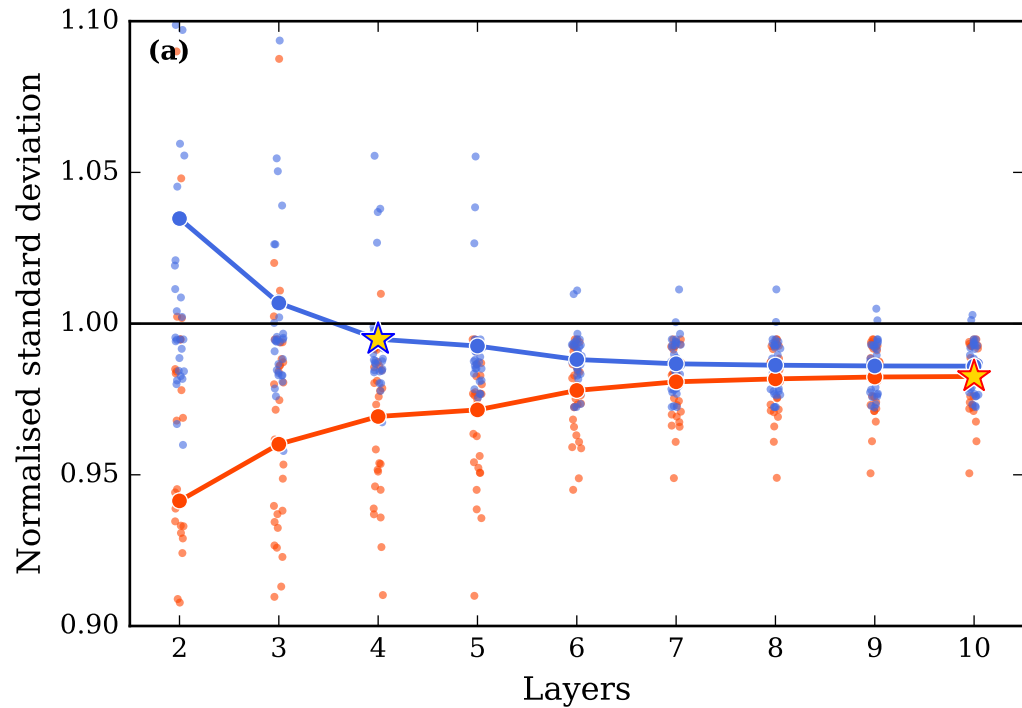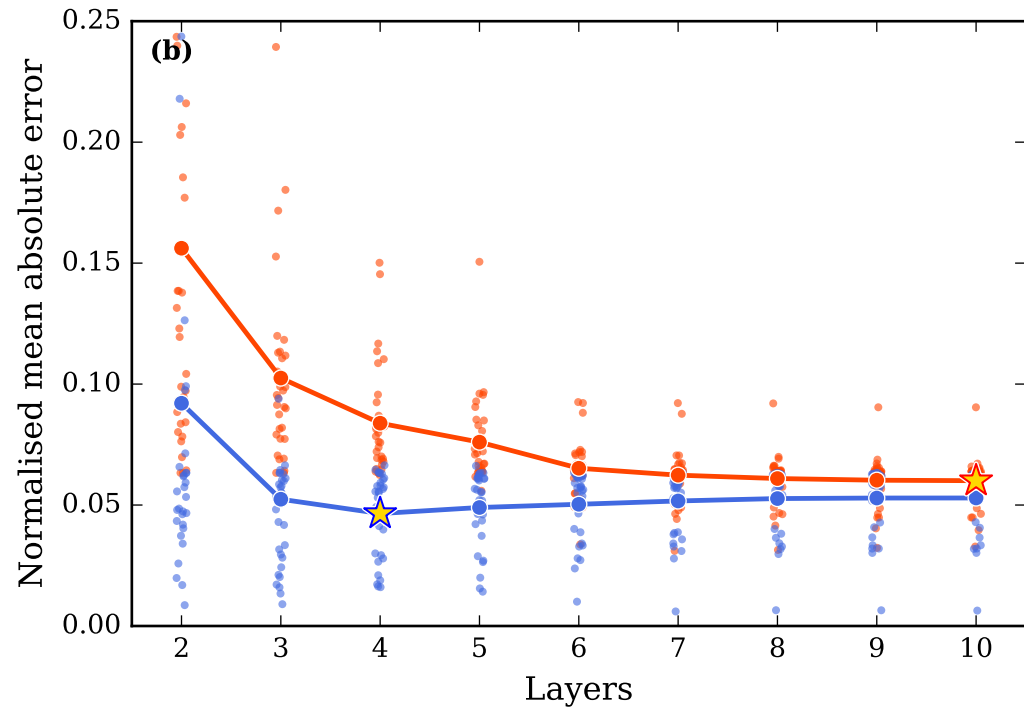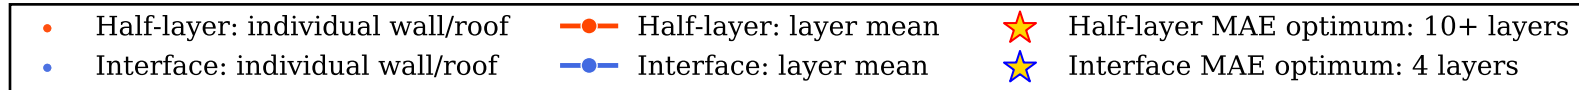

Supplement: Supplementary file 7 [file gmd-10-991-2017-supplement.zip]

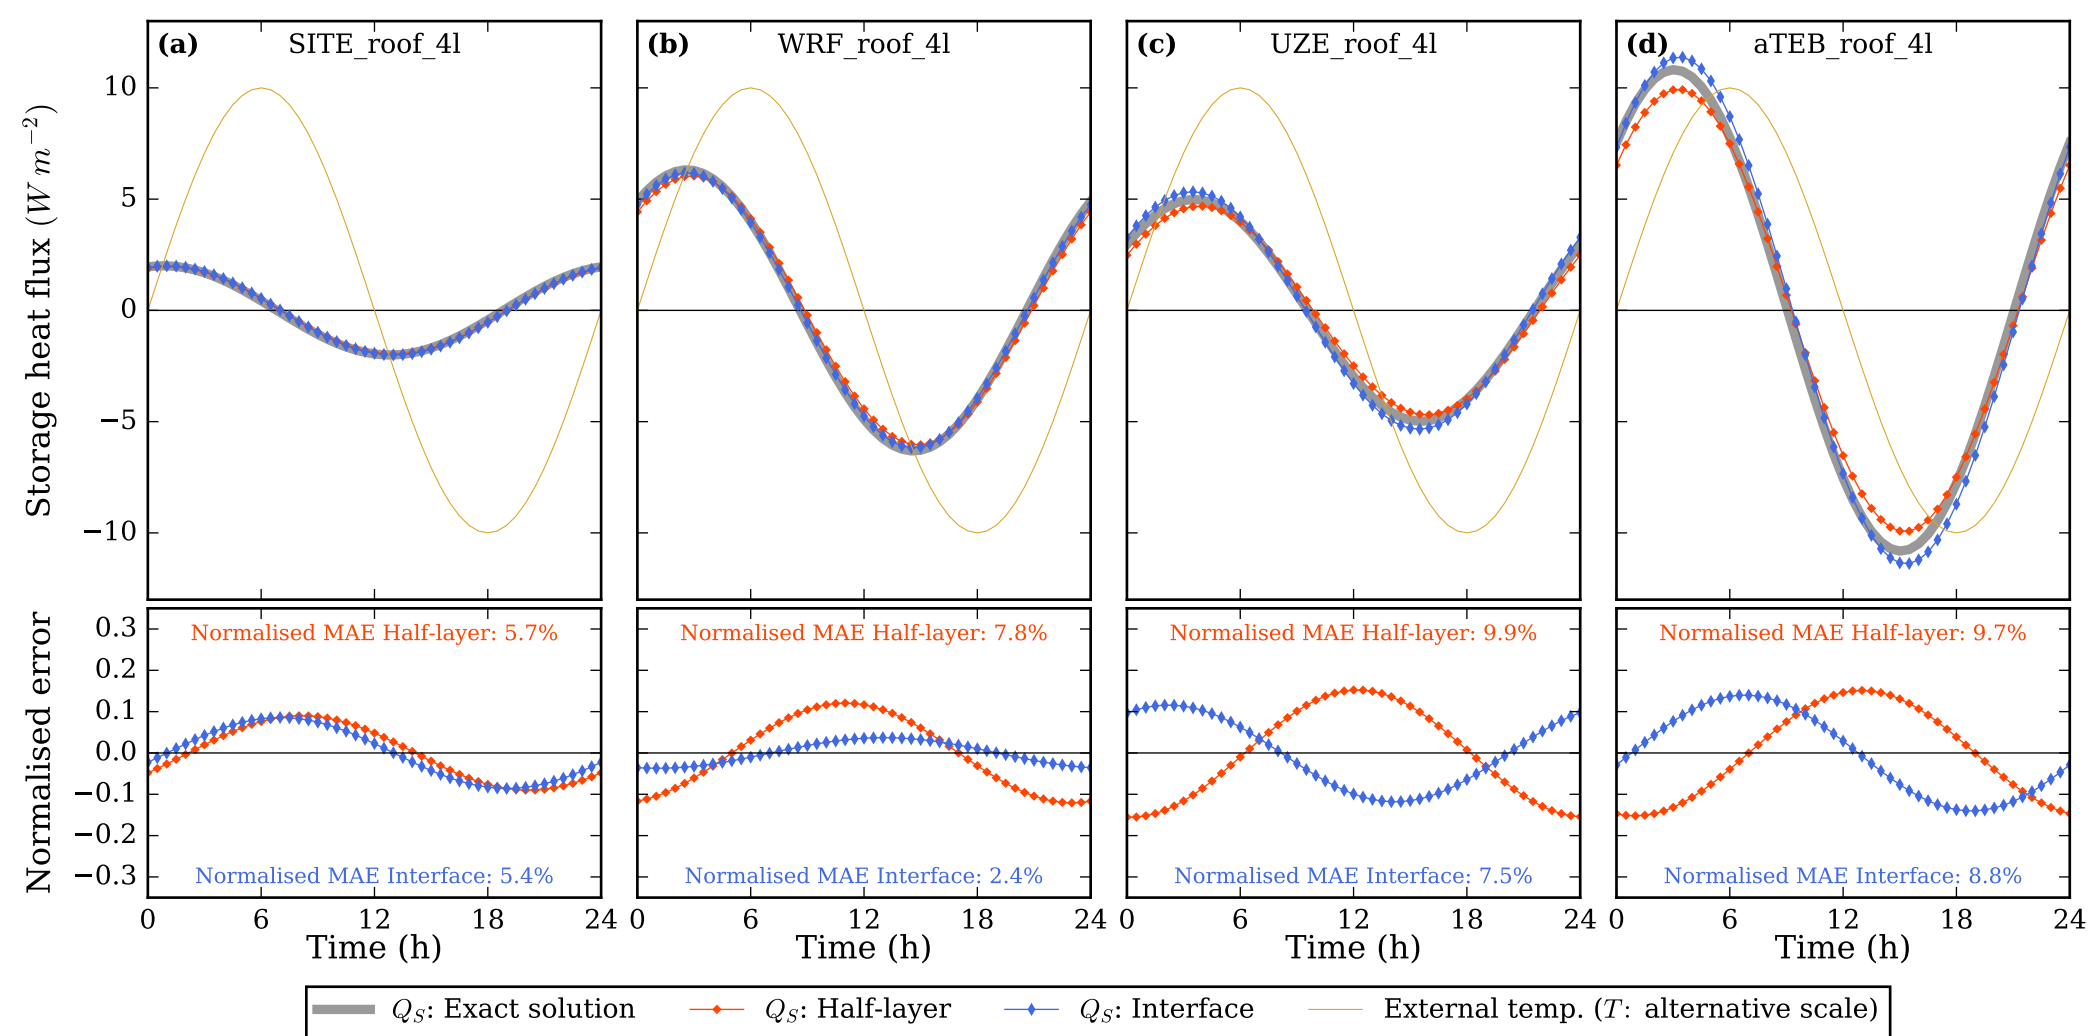

Supplement: Supplementary file 8 [file gmd-10-991-2017-supplement.zip]
